# Supplementary material
Source: PubMed Central journal article supplement (PMC3792650)

## Lck Sequestration Model

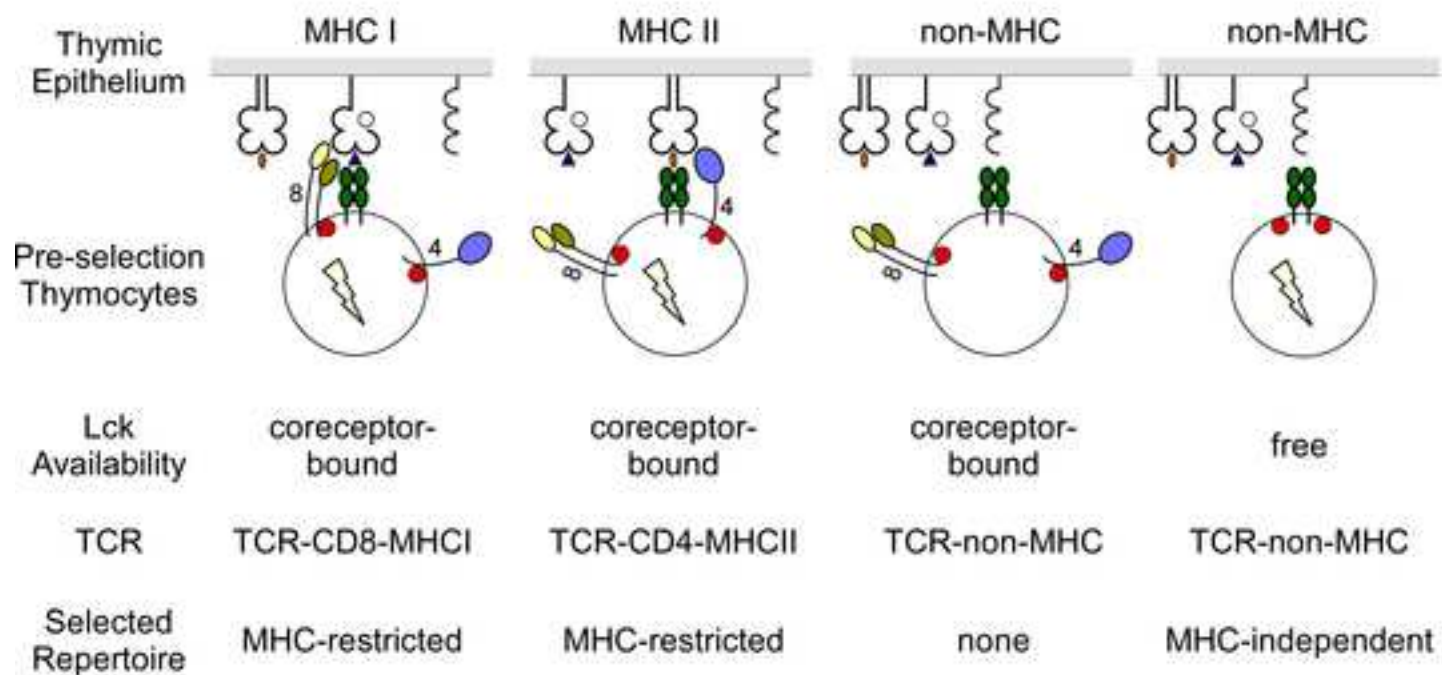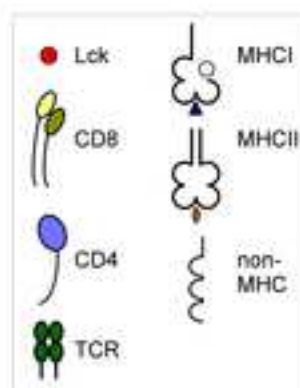

Figure S1

**A**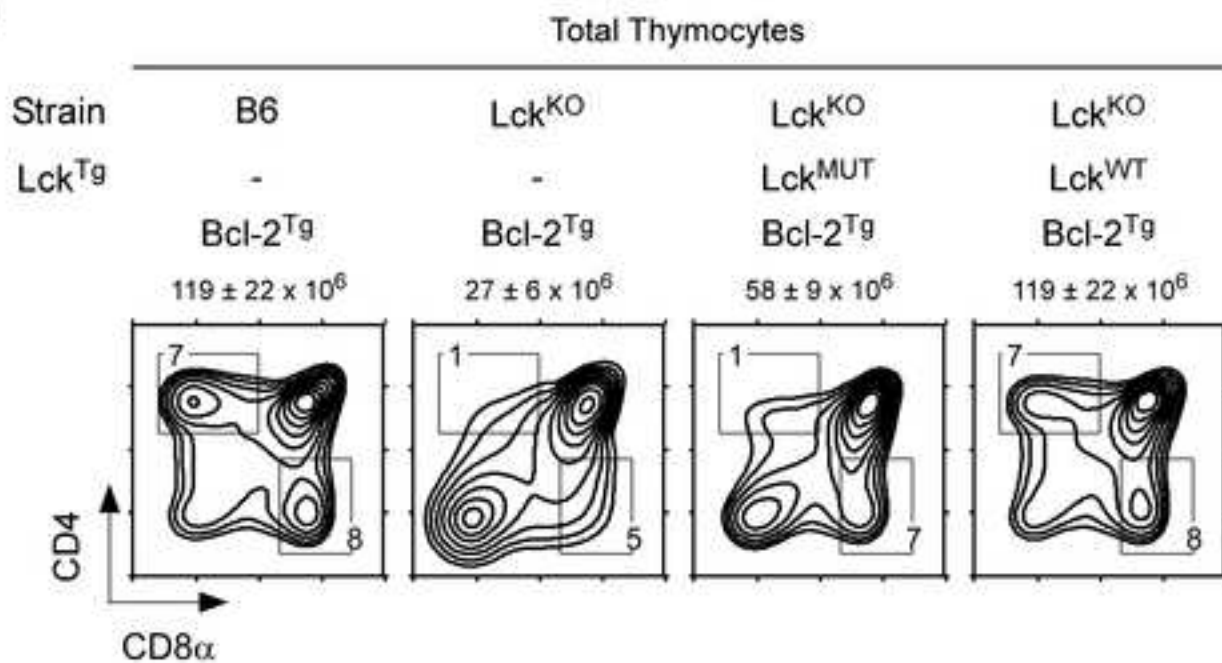**B**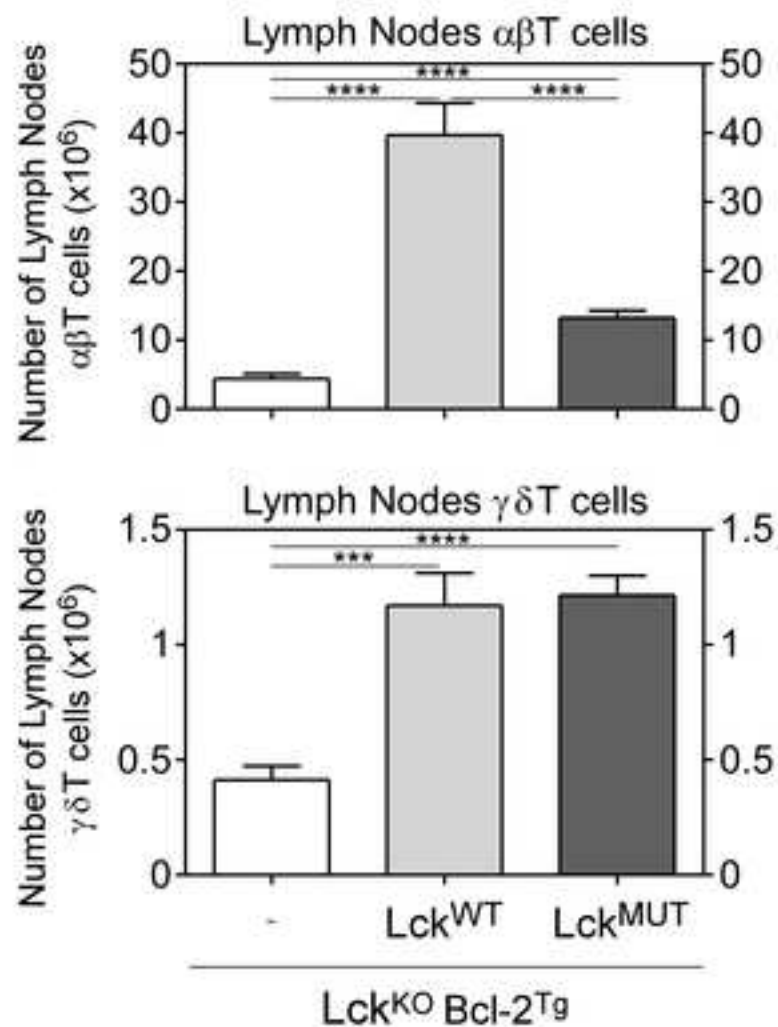**Figure S2**

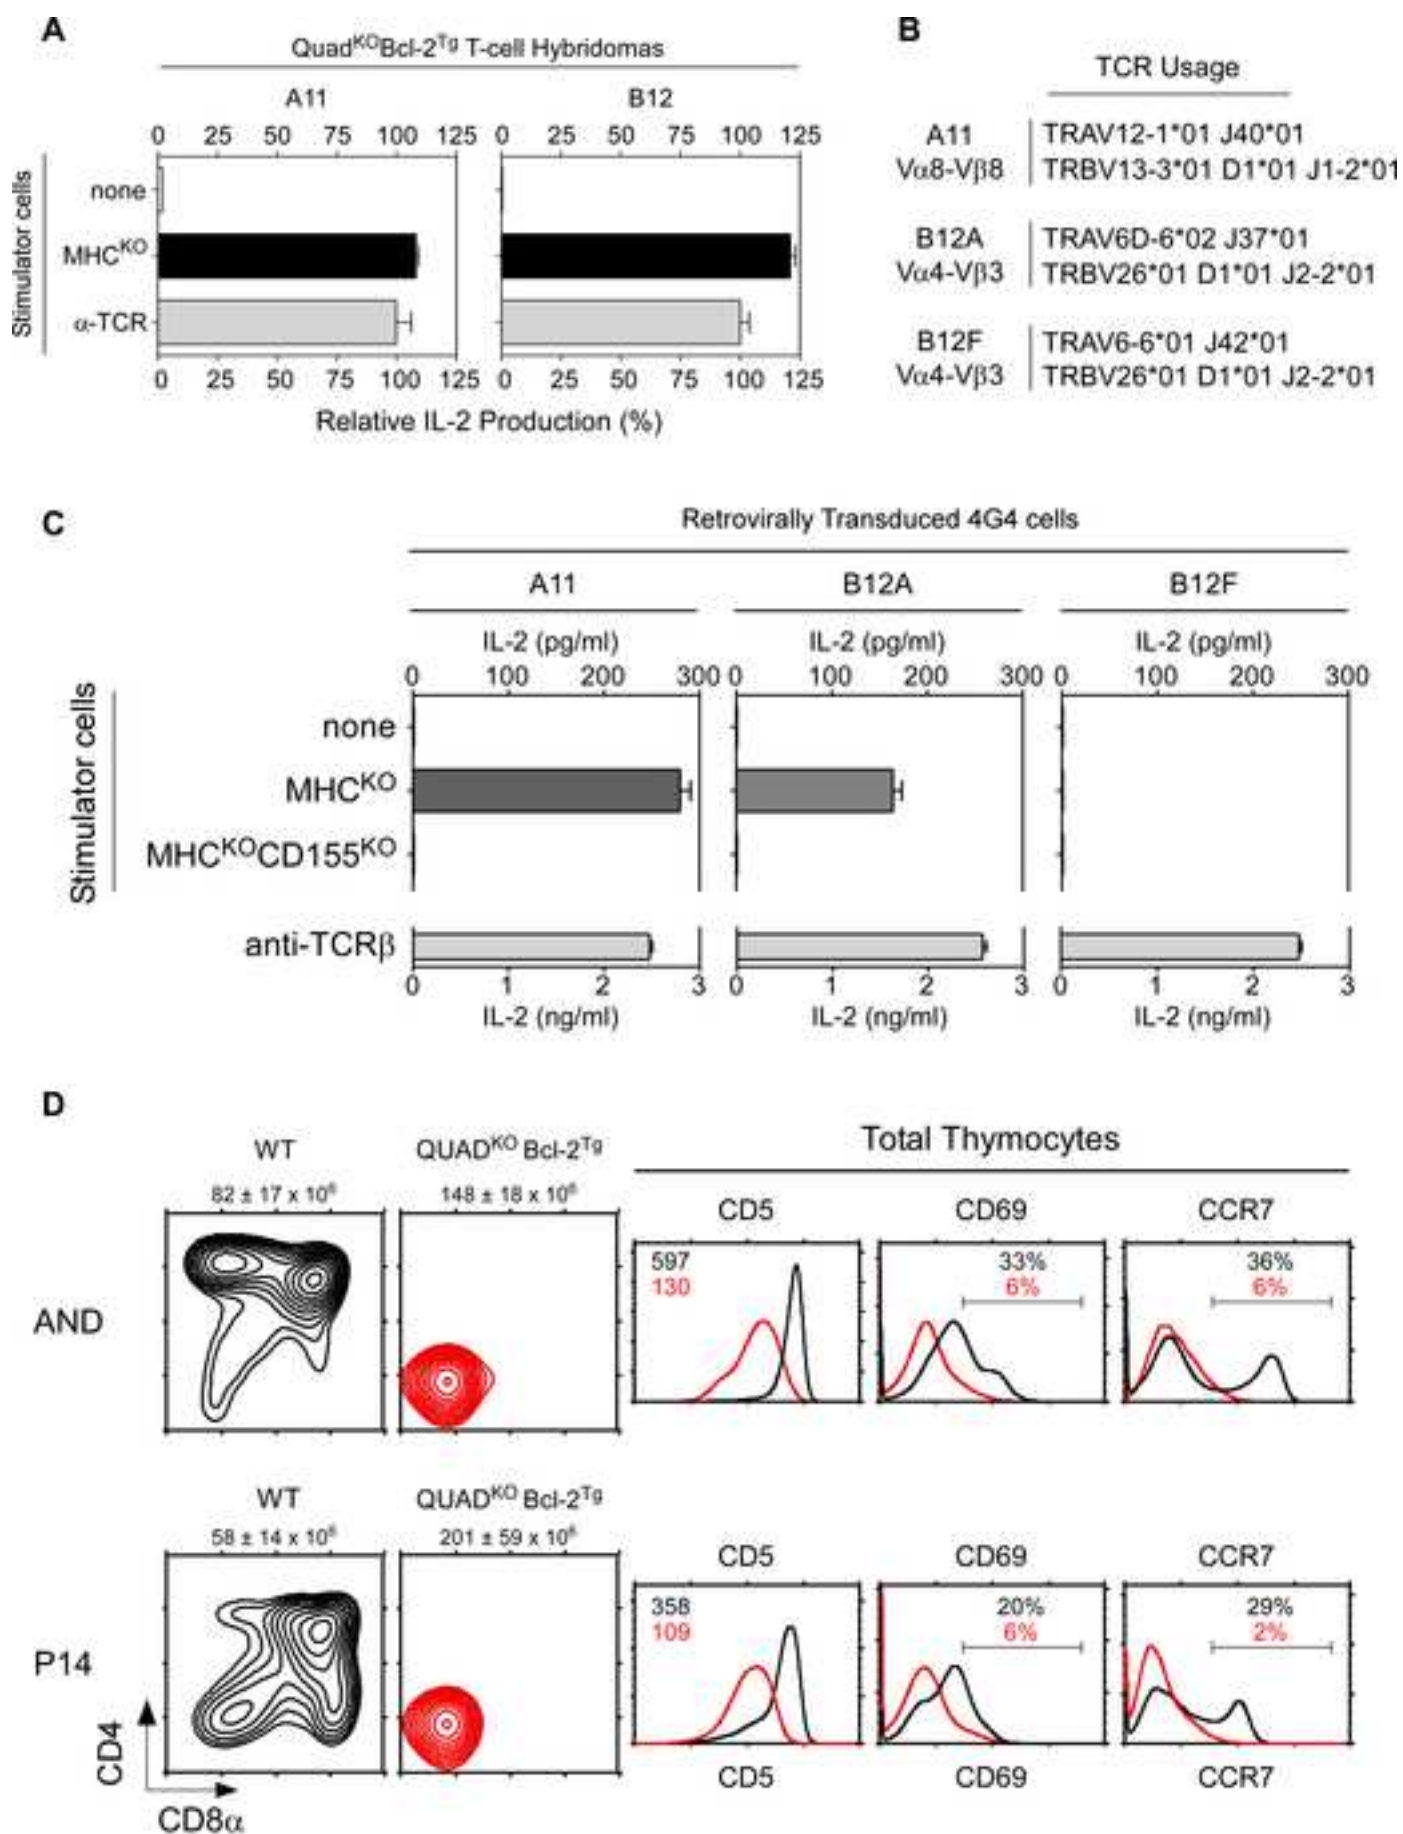

Figure S3

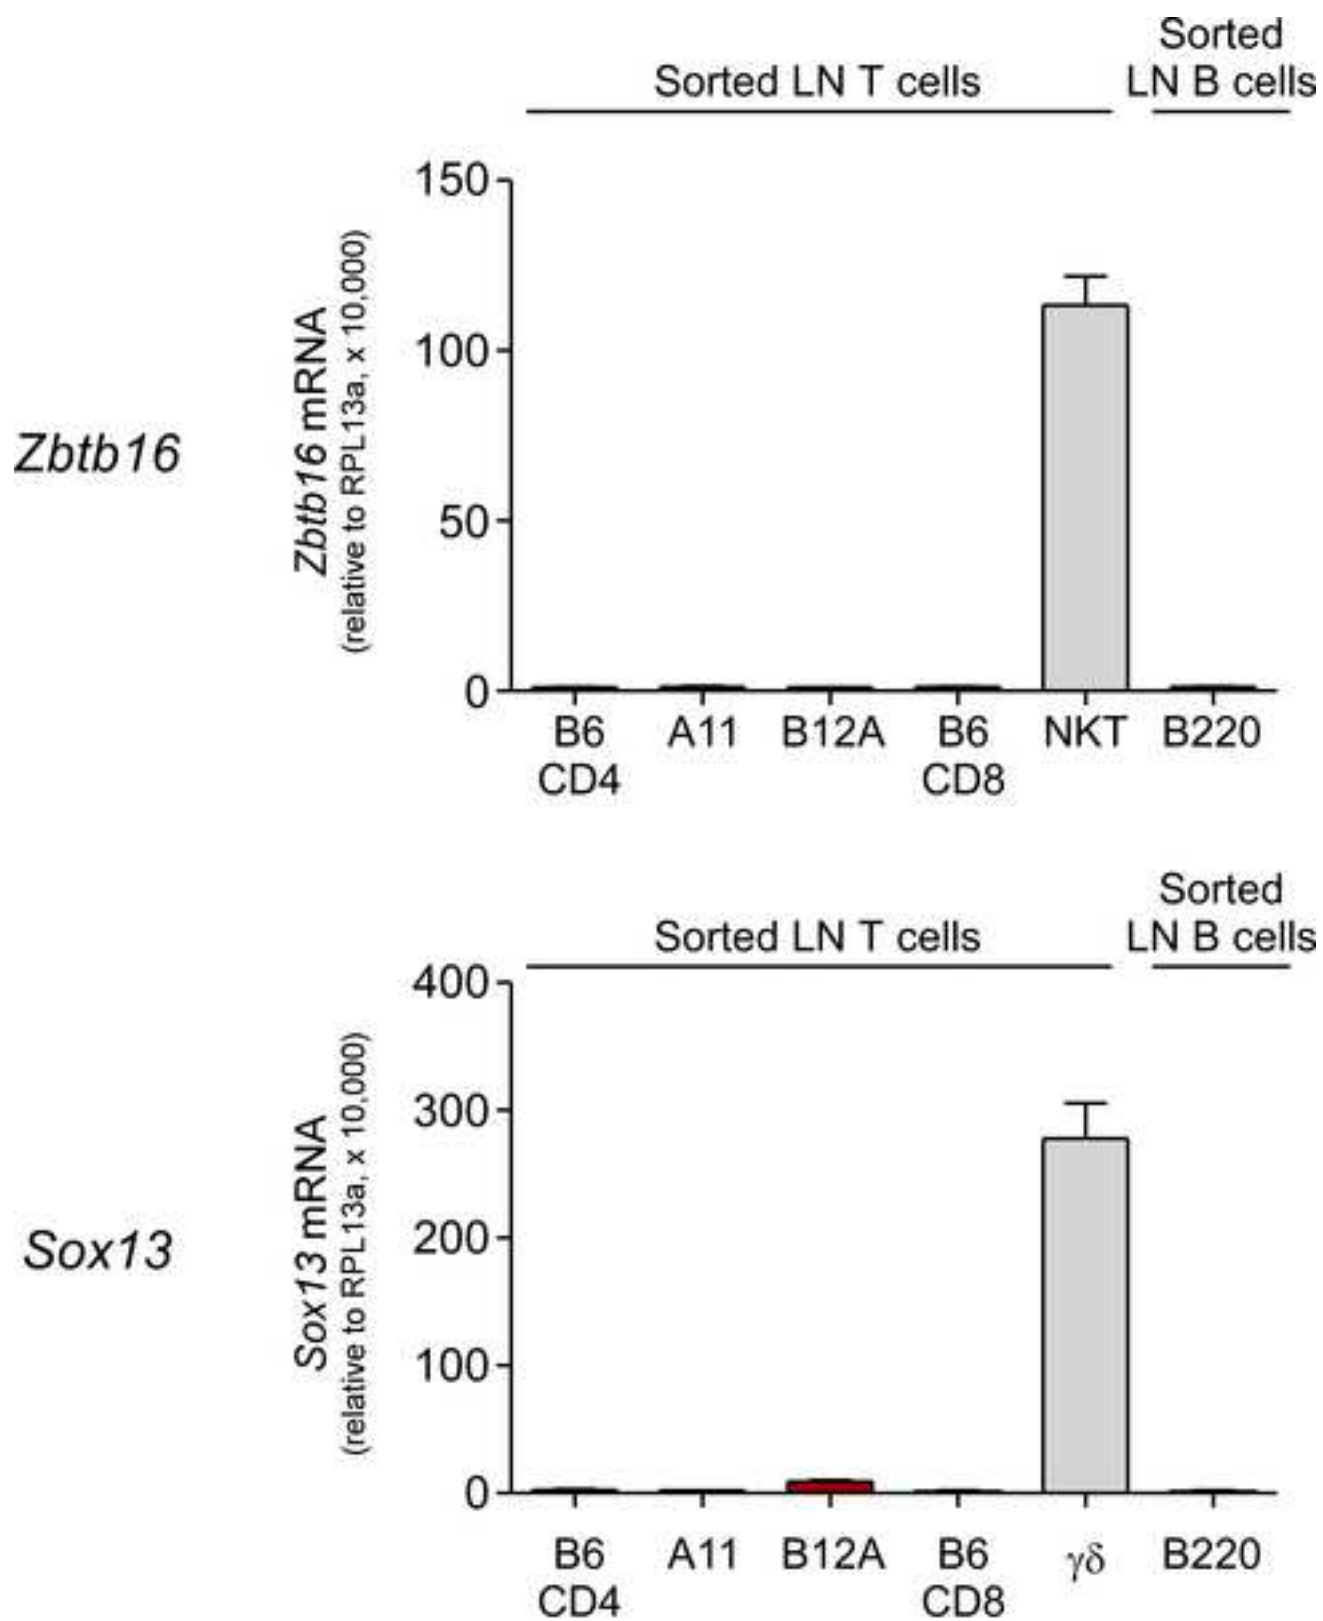

Figure S4

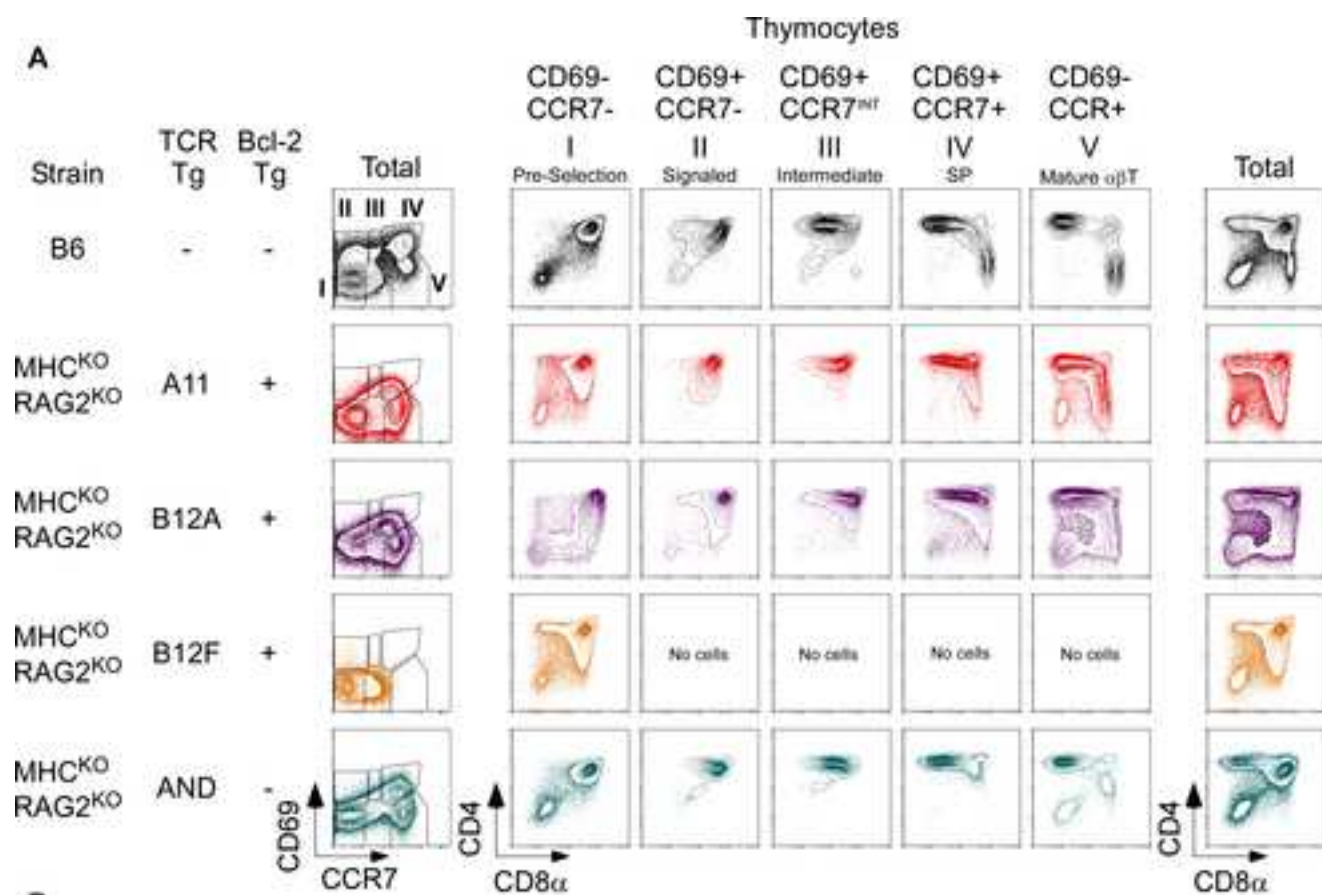**B**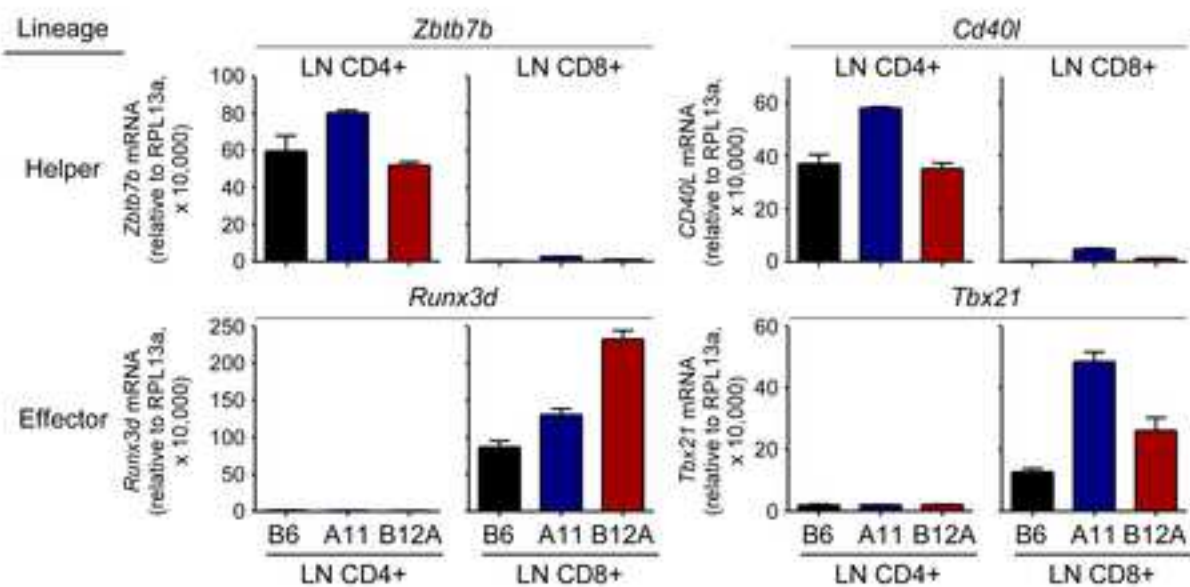**C**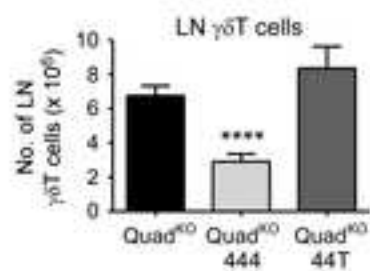

Figure S5

Supplement: NIHMS515720-supplement-02.pdf [file NIHMS515720-supplement-02.pdf]
